# Supplementary material for: Effects of Group Counseling Programs, Cognitive Behavioral Therapy, and Sports Intervention on Internet Addiction in East Asia: A Systematic Review and Meta-Analysis
Source: Int J Environ Res Public Health. 2017 Nov 28;14(12):1470. doi: 10.3390/ijerph14121470 (PMC5750889; doi:10.3390/ijerph14121470)
Supplement: Supplementary file 1 [file ijerph-14-01470-s001.pdf]

**Table S1: Studies included in the meta-analysis.**

| Number | Study             | Title                                                                                                                                   |
|--------|-------------------|-----------------------------------------------------------------------------------------------------------------------------------------|
| 1      | Li et al, 2014    | The effects of Adlerian group counseling on college students with Internet addiction                                                    |
| 2      | Li et al, 2015    | Effects of group counseling on Internet addiction among vocational medical students                                                     |
| 3      | Duan et al, 2012  | Psychological intervention on Internet dependence in college students and its effect: based on the control test in human police academy |
| 4      | Ren et al, 2014   |                                                                                                                                         |
| 5      | Cheng et al, 2015 | The intervention effect of hypnosis combined with cognitive behavioral therapy to cyber deviant behavior                                |
| 6      | Zhao et al, 2015  | Internet addiction college students: social-psychological factors and group psychological intervention                                  |
| 7      | Ma et al, 2011    | Study of psychological intervention of college students' Internet addiction disorder                                                    |
| 8      | Qu et al, 2006    | Study of the psychological mechanism college students' Internet addiction and psychological intervention                                |
| 9      | Ma et al, 2011    | Case-control study of cognitive behavior in the tendency of Internet addiction and loneliness among the undergraduates                  |
| 10     | Duan et al, 2013  | The investigations, intervention of Internet addiction in college students -taking human police academy as an example                   |
| 11     | Wen et al, 2008   | The research of group counseling on Internet-dependent college students                                                                 |
| 12     | Zheng et al, 2010 | Compared study of group psychotherapy in College Students with Internet addiction                                                       |
| 13     | Zhao et al, 2015  | Empirical research of group counseling to college students Internet addiction                                                           |
| 14     | Chi et al, 2012   | Internet addiction college students sports experimental study of intervention in city of Changchun                                      |
| 15     | Guan et al, 2012  | Effect of group therapy on higher vocational school students with Internet dependence                                                   |
| 16     | Ming et al, 2014  | Evaluation study of cognitive-behavioral therapy to Internet addiction intervention effects of medical students                         |
| 17     | Xu et al, 2012    | Research on the interference of Internet addiction on the basis of self-controlled group guidance                                       |
| 18     | Chen et al, 2011  | Evaluation of intervention effects of periodical group counseling to college students Internet addiction                                |
| 19     | Zhang et al, 2013 | A study on the sports intervention of undergraduates' Internet addiction in Kunming city                                                |
| 20     | Zhang et al, 2011 | Internet addiction investigate and group psychological study of country junior high school                                              |
| 21     | Li et al, 2009    | Cognitive-behavior therapy on adolescent with Internet addiction disorder                                                               |
| 22     | Guo et al, 2007   | A study on psychotherapy and exercise prevention for Internet addiction and disorder among adolescents                                  |
| 23     | Guo et al, 2008   | Impact evaluation of group counseling on Internet addiction adolescents                                                                 |

---

|    |                   |                                                                                                                          |
|----|-------------------|--------------------------------------------------------------------------------------------------------------------------|
| 24 | Guo et al, 2006   | A study on psychotherapy and exercise prevention on Internet addiction disorder of adolescents                           |
| 25 | Lv et al, 2012    | The effects of group counseling on Internet-dependent college students                                                   |
| 26 | Wang et al, 2012  | Evaluation of intervention effect of Internet addiction by cognitive behavioral therapy for college students             |
| 27 | Ming et al, 2014  | The effect of cognitive behavioral therapy on the intervention of Internet addiction behavior of medical students        |
| 28 | Zhao et al, 2010  | Effects of cognitive behavioral training on college students Internet addiction disorder                                 |
| 29 | Zheng et al, 2013 | The efficacy of neuro linguistic programming group counseling on university freshmen with tendency of Internet addiction |
| 30 | Deng et al, 2014  | Study on the intervention of physical exercise on the Internet addiction of higher vocational college students           |
| 31 | Zhang et al, 2009 | Study on the intervention of physical exercise on the Internet addiction of adolescents                                  |
| 32 | Wu et al, 2013    | Empirical study about using sports means to intervene in Internet addiction of college students                          |
| 33 | Lou et al, 2010   | An empirical study on the intervention effect of physical exercise prescription on teenage Internet addiction            |
| 34 | Fu et al, 2010    | Experimental study on sports intervention of adolescent Internet addiction                                               |
| 35 | Gao et al, 2012   | Influence of sport interference on university students' network addiction                                                |
| 36 | Liu et al, 2013   | Effects of Internet addiction group counseling on Internet using and study management in college students                |
| 37 | Bai et al, 2007   | The effects of group counseling on Internet-dependent college students                                                   |
| 38 | Zhou et al, 2010  | Study on intervention effects of group counseling on Internet-dependent college students                                 |
| 39 | Zhao et al, 2016  | Control study of curative effect on Internet addiction disorder elimination by cognitive-behavioral therapy in groups    |
| 40 | Mou et al, 2013   | Intervention effects of group sand play therapy on undergraduate with Internet dependence                                |
| 41 | Kong et al, 2011  | Effect of group guidance on Internet addiction disorder among university students                                        |
| 42 | Wang et al, 2008  | Research on the effect of group counseling intervention on adolescents' network dependence                               |
| 43 | Zhong et al, 2009 | Effect of group psychological intervention in adolescents on Internet addiction                                          |
| 44 | Wu et al, 2009    | The study of group training for weakening higher vocational students Internet addiction tendency                         |
| 45 | Liu et al, 2010   | Effects of centralized and closed group counseling on Internet-dependent undergraduates                                  |
| 46 | Chen et al, 2010  | Group psychotherapy among college students with Internet addiction in Wenzhou                                            |
| 47 | Ge et al, 2014    | Effects of psychodrama group counseling on internet addiction and social avoidance in urban left-behind children         |
| 48 | Wang et al, 2009  | Effect of psychological drama therapy on negative emotion of patients with Internet addiction                            |

---

---

|    |                   |                                                                                                                                                                   |
|----|-------------------|-------------------------------------------------------------------------------------------------------------------------------------------------------------------|
| 49 | Zhang et al, 2013 | The study of interventions cognitive therapy to medical students with Internet addiction disorder                                                                 |
| 50 | Feng et al, 2011  | The study of group counseling intervention on students' network addiction by using core self-evaluation                                                           |
| 51 | Liao et al, 2008  | Intervention of aerobic exercise for Internet addiction college students                                                                                          |
| 52 | Zhang et al, 2012 | Effect of exercise prescription on college students' Internet dependence symptom                                                                                  |
| 53 | Liu et al, 2014   | Moral education evaluation based on educational dialogue-the trend of moral education evaluation reform under the dialogue paradigm of moral education evaluation |
| 54 | Cao et al, 2007   | Control study of group psychotherapy on middle school students with Internet overuse                                                                              |
| 55 | Li et al, 2014    | Current situation and exercise prescription intervention of Internet addiction among middle school students                                                       |
| 56 | Kim et al, 2008   | The Effect of a R/T Group Counseling Program on The Internet Addiction Level and Self-Esteem of Internet Addiction University Students                            |
| 57 | Zhang et al, 2016 | Effects of craving behavioral intervention on neural substrates of cue-induced craving in Internet gaming disorder                                                |
| 58 | Zhang et al, 2016 | Altered resting-state neural activity and changes following a craving behavioral intervention for Internet gaming disorder                                        |

---

**Table S2: Risk of bias assessment for randomised trials.**

| Study             | Random sequence generation | Allocation concealment | Blinding of participants and researchers | Blinding of outcome assessment | Incomplete outcome data | Selective reporting | Other bias |
|-------------------|----------------------------|------------------------|------------------------------------------|--------------------------------|-------------------------|---------------------|------------|
| Li et al, 2014    | Unclear                    | Unclear                | Unclear                                  | Low                            | Low                     | Low                 | Low        |
| Li et al, 2015    | Unclear                    | Unclear                | Unclear                                  | Low                            | Low                     | Low                 | Low        |
| Duan et al, 2012  | Unclear                    | Low                    | Unclear                                  | Low                            | Low                     | Unclear             | Low        |
| Ren et al, 2014   | Low                        | Unclear                | Unclear                                  | Low                            | Low                     | Low                 | Low        |
| Cheng et al, 2015 | Unclear                    | Unclear                | Unclear                                  | Low                            | Unclear                 | Low                 | Low        |
| Zhao et al, 2015  | Low                        | Low                    | Unclear                                  | Low                            | Low                     | Low                 | Low        |
| Ma et al, 2011    | Low                        | Low                    | Unclear                                  | Low                            | Low                     | Low                 | Low        |
| Qu et al, 2006    | Unclear                    | Low                    | Unclear                                  | Low                            | Low                     | Low                 | Low        |
| Ma et al, 2011    | Low                        | Unclear                | Unclear                                  | Low                            | Low                     | Low                 | Low        |
| Duan et al, 2013  | Low                        | Unclear                | Unclear                                  | Low                            | Low                     | Low                 | Low        |
| Wen et al, 2008   | Low                        | Unclear                | Unclear                                  | Low                            | Low                     | Low                 | Low        |
| Zheng et al, 2010 | Unclear                    | Low                    | Unclear                                  | Low                            | Unclear                 | Low                 | Low        |
| Zhao et al, 2015  | Unclear                    | Low                    | Unclear                                  | Low                            | Low                     | Unclear             | Low        |
| Chi et al, 2012   | Low                        | Unclear                | Unclear                                  | Low                            | Low                     | Low                 | Low        |
| Guan et al, 2012  | Low                        | Unclear                | Unclear                                  | Low                            | Low                     | Low                 | Low        |
| Ming et al, 2014  | Unclear                    | Low                    | Unclear                                  | Low                            | Low                     | Low                 | Unclear    |
| Xu et al, 2012    | Low                        | Low                    | Unclear                                  | Low                            | Low                     | Low                 | Unclear    |
| Chen et al, 2011  | Unclear                    | Low                    | Unclear                                  | Low                            | Low                     | Unclear             | Unclear    |
| Zhang et al, 2013 | Low                        | Low                    | Unclear                                  | Low                            | Unclear                 | Low                 | Unclear    |
| Zhang et al, 2011 | Low                        | Unclear                | Unclear                                  | Low                            | Low                     | Low                 | Low        |
| Li et al, 2009    | Low                        | Low                    | Unclear                                  | Low                            | Low                     | Low                 | Low        |
| Guo et al, 2007   | Unclear                    | Low                    | Unclear                                  | Low                            | Low                     | Unclear             | Low        |

|                   |         |         |         |     |         |         |         |
|-------------------|---------|---------|---------|-----|---------|---------|---------|
| Guo et al, 2008   | Low     | Low     | Unclear | Low | Low     | Low     | Unclear |
| Guo et al, 2006   | Low     | Unclear | Unclear | Low | Unclear | Low     | Unclear |
| Lv et al, 2012    | Low     | Low     | Unclear | Low | Low     | Low     | Low     |
| Wang et al, 2012  | Low     | Low     | Unclear | Low | Low     | Low     | Low     |
| Ming et al, 2014  | Unclear | Unclear | Unclear | Low | Low     | Low     | Low     |
| Zhao et al, 2010  | Low     | Unclear | Unclear | Low | Low     | Low     | Unclear |
| Zheng et al, 2013 | Low     | Low     | Unclear | Low | Low     | Low     | Unclear |
| Deng et al, 2014  | Unclear | Unclear | Unclear | Low | Low     | Low     | Low     |
| Zhang et al, 2009 | Low     | Low     | Unclear | Low | Low     | Unclear | Low     |
| Wu et al, 2013    | Unclear | Unclear | Unclear | Low | Unclear | Low     | Low     |
| Lou et al, 2010   | Low     | Unclear | Unclear | Low | Low     | Low     | Low     |
| Fu et al, 2010    | Low     | Low     | Unclear | Low | Low     | Low     | Unclear |
| Gao et al, 2012   | Low     | Low     | Unclear | Low | Low     | Low     | Low     |
| Liu et al, 2013   | Unclear | Unclear | Unclear | Low | Unclear | Low     | Low     |
| Bai et al, 2007   | Low     | Low     | Unclear | Low | Unclear | Low     | Unclear |
| Zhou et al, 2010  | Unclear | Low     | Unclear | Low | Low     | Unclear | Low     |
| Zhao et al, 2016  | Unclear | Low     | Unclear | Low | Low     | Low     | Low     |
| Mou et al, 2013   | Unclear | Low     | Unclear | Low | Low     | Low     | Low     |
| Kong et al, 2011  | Unclear | Low     | Unclear | Low | Low     | Low     | Low     |
| Wang et al, 2008  | Low     | Low     | Unclear | Low | Unclear | Low     | Low     |
| Zhong et al, 2009 | Unclear | Low     | Unclear | Low | Low     | Low     | Low     |
| Wu et al, 2009    | Low     | Unclear | Unclear | Low | Low     | Low     | Unclear |
| Liu et al, 2010   | Unclear | Low     | Unclear | Low | Low     | Low     | Low     |
| Chen et al, 2010  | Unclear | Low     | Unclear | Low | Low     | Low     | Low     |
| Ge et al, 2014    | Low     | Low     | Unclear | Low | Low     | Low     | Unclear |
| Wang et al, 2009  | Unclear | Unclear | Unclear | Low | Unclear | Unclear | Low     |

|                   |         |         |         |     |         |         |         |
|-------------------|---------|---------|---------|-----|---------|---------|---------|
| Zhang et al, 2013 | Low     | Low     | Unclear | Low | Low     | Unclear | Unclear |
| Feng et al, 2011  | Low     | Low     | Unclear | Low | Low     | Low     | Low     |
| Liao et al, 2008  | Low     | Low     | Unclear | Low | Low     | Low     | Low     |
| Zhang et al, 2012 | Low     | Unclear | Unclear | Low | Low     | Low     | Low     |
| Liu et al, 2014   | Unclear | Low     | Unclear | Low | Low     | Unclear | Unclear |
| Cao et al, 2007   | Low     | Unclear | Unclear | Low | Unclear | Low     | Low     |
| Li et al, 2014    | Low     | Low     | Unclear | Low | Low     | Low     | Low     |
| Kim et al, 2008   | Unclear | Low     | Unclear | Low | Low     | Low     | Unclear |
| Zhang et al, 2016 | Low     | Unclear | Unclear | Low | Low     | Unclear | Low     |
| Zhang et al, 2016 | Low     | Low     | Unclear | Low | Unclear | Low     | Low     |
